# Supplementary material for: 12-Tungstophosphoric acid/zirconia—a highly active stable solid acid—comparison with a tungstated zirconia catalystElectronic supplementary information (ESI) available: W and P analysis in the reaction mixtures. Fig. S1: 31P MAS NMR. Fig. S2: FT-IR pyridine adsorption spectra. Fig. S3: conversion and acidity vs. TPA loading. See http://www.rsc.org/suppdata/cc/b2/b200722c/
Source: Royal Society of Chemistry journal article supplement (doi:10.1039/b200722c), 2002-04-16
Supplement: b200722c.doc [file b200722c.doc]

**Supplementary Material (ESI) for Chemical Communications**

**This journal is © The Royal Society of Chemistry 2002**

**Tungsten and Phosphorus analysis in reaction mixture (test for leaching)**

After reaction, filtrate (separated from catalyst) is checked for the presence of tungsten (W) and phosphorus (P) by Inductively coupled plasma-optical emission spectroscopy (ICP-OES, Perkin Elmer-Emission Spectrometer Plasma-1000) carried out at Center for Materials for Electronic Technology, **C-MET**, Pune.

10 ml of aliquot (filtrate) is digested with 1 ml conc. HNO3 for 1h. To this 1 ml of conc. H2SO4 is added and heated at 80C for 30 min. It is then diluted with 10 ml deionized water and heated to boiling and filtered through Whatman 42 filter paper and washed 2-3 times with deionized water to get total volume 10 ml for the analysis. Measurements were made for P, with NH4H2PO4 as standard (213.618 nm) and for W, with Na2WO4 as standard (207.911 nm).

| Fig.1 | 31P MAS NMR spectra of a) 10; b) 15; c) 20 wt. % TPA/ZrO2 catalysts prepared in methanol and calcined at 1023K. |
| --- | --- |
| Fig.2 | FT-IR pyridine adsorption spectra of a) 5; b) 10; c)15; d) 20; e) 30 wt. % TPA/ZrO2 catalysts prepared in methanol and calcined at 1023K and evacuated at 573 K. |
| Fig.3 | Conversion and Acidity versus TPA loading (catalyst prepared in methanol). Reaction conditions: ***benzylation*** :- phenol = 4.2g, PhCH2OH = 0.8g, catalyst = 0.08g, temp. = 363K and time = 1h; ***acylation*** :- 2-MN = 2g, Ac2O = 3.86g, catalyst = 0.2g, temp. = 393K and time = 12h. |

Fig.1


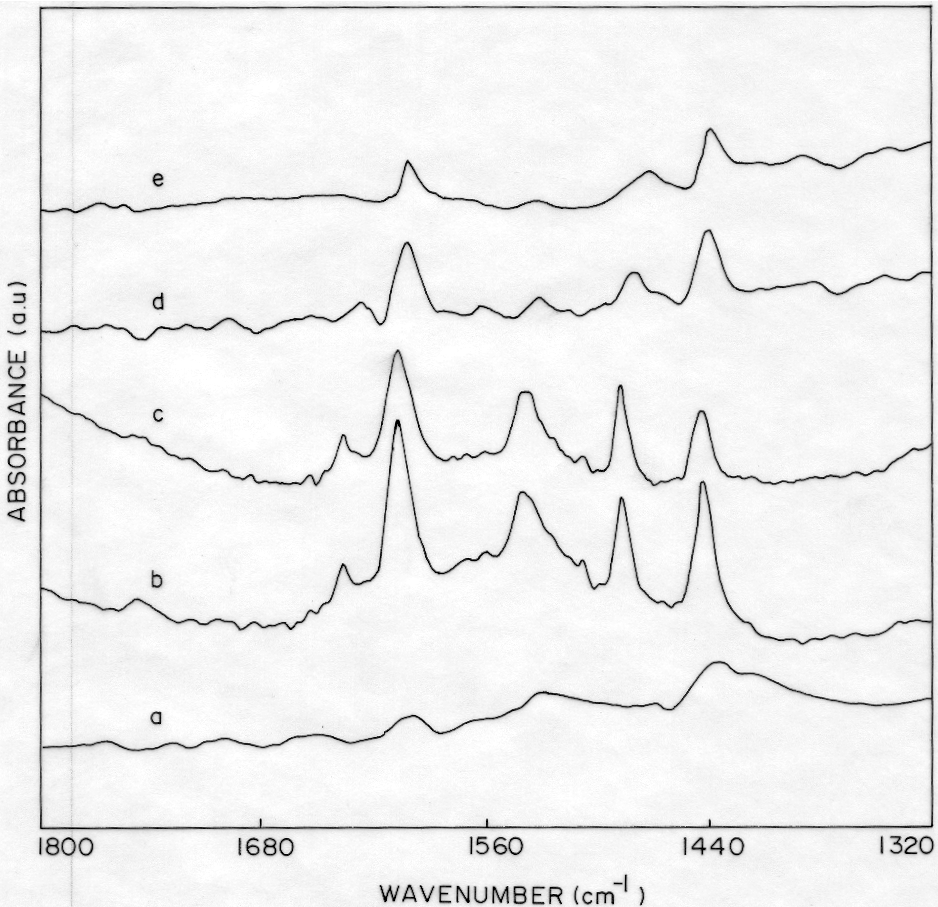


Fig.2

Fig.3
